# Supplementary material for: Graphdiyne coordinated transition metals as single-atom catalysts for nitrogen fixation
Source: Royal Society of Chemistry journal article supplement (doi:10.1039/d0cp00722f), 2020-01-01
Supplement: d0cp00722f1.pdf [file d0cp00722f1.pdf]

## Electronic Supplementary Information

### Graphdiyne coordinated transition metals as single-atom catalysts for nitrogen fixation

Zhen Feng,<sup>a, b</sup> Yanan Tang,<sup>\*c</sup> Weiguang Chen,<sup>c</sup> Yi Li,<sup>b</sup> Renyi Li,<sup>b</sup> Yaqiang Ma,<sup>b</sup> and  
Xianqi Dai<sup>\*b</sup>

#### Contents

1. Structure and Band structure of the pristine GDY monolayer.
2. Optimized stable geometries of TM@GDY sheets.
3. Optimized configuration and DOS of N<sub>2</sub> molecule adsorbed on pristine GDY.
4. Optimized geometries of N<sub>2</sub> adsorption on various TM@GDY sheets.
5. The N<sub>2</sub> molecule dissociation pathway on V@GDY and Cr@GDY.
6. Free-energy diagrams for N<sub>2</sub> reduction through on TM@GDY.
7. Zero-point energy corrections and entropic contributions to the free energy.
8. Binding energy of TM atom and GDY, cohesive energy of bulk metal, and the amounts of charge transmitted from the TM atoms to the GDY monolayers.
9. The calculated limiting potentials and PLS for the different catalysts.

---

<sup>a</sup> School of Materials Science and Engineering, Henan Institute of Technology, Xinxiang, Henan 453000, China.

<sup>b</sup> School of Physics, Henan Normal University, Xinxiang, Henan 453007, China. E-mail: xqdai@htu.cn

<sup>c</sup> College of Physics and Electronic Engineering, Zhengzhou Normal University, Zhengzhou 450044, China. E-mail: yntang2010@163.com

## Supplementary Figures

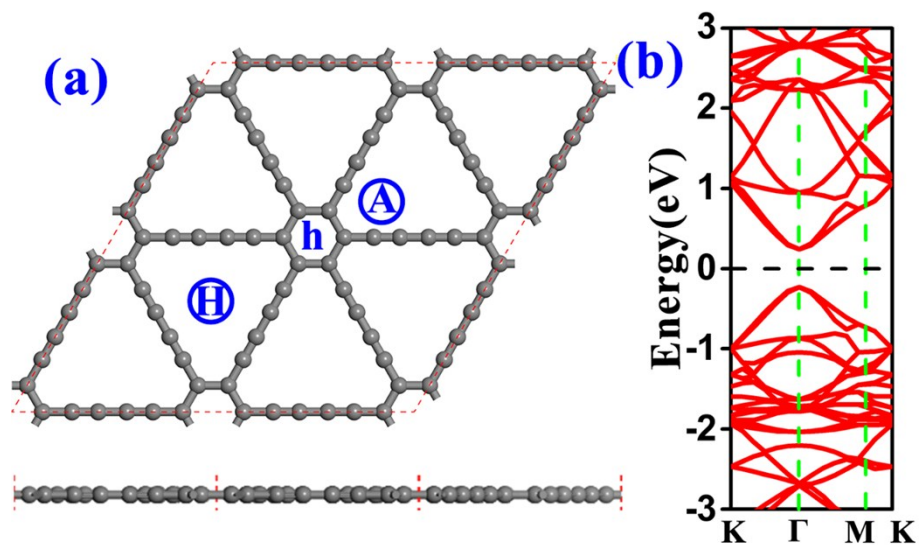

**Fig. S1.** (a) Structure of the pristine GDY monolayer ( $2\times 2$ ) supercell with the considered adsorption sites for the single metal atoms. The gray balls represent C atoms. (b) Band structure of the pristine GDY monolayer. The Fermi level is set to 0 eV.

The geometries of GDY monolayer were relaxed, as shown in **Fig. S1(a)**, the optimized lattice constants of GDY is 9.44 Å. **Fig. S1(b)** shows that the pristine GDY exhibits the semiconductor with a direct band gap ( $E_{\text{gap}}$ ) of 0.47 eV.

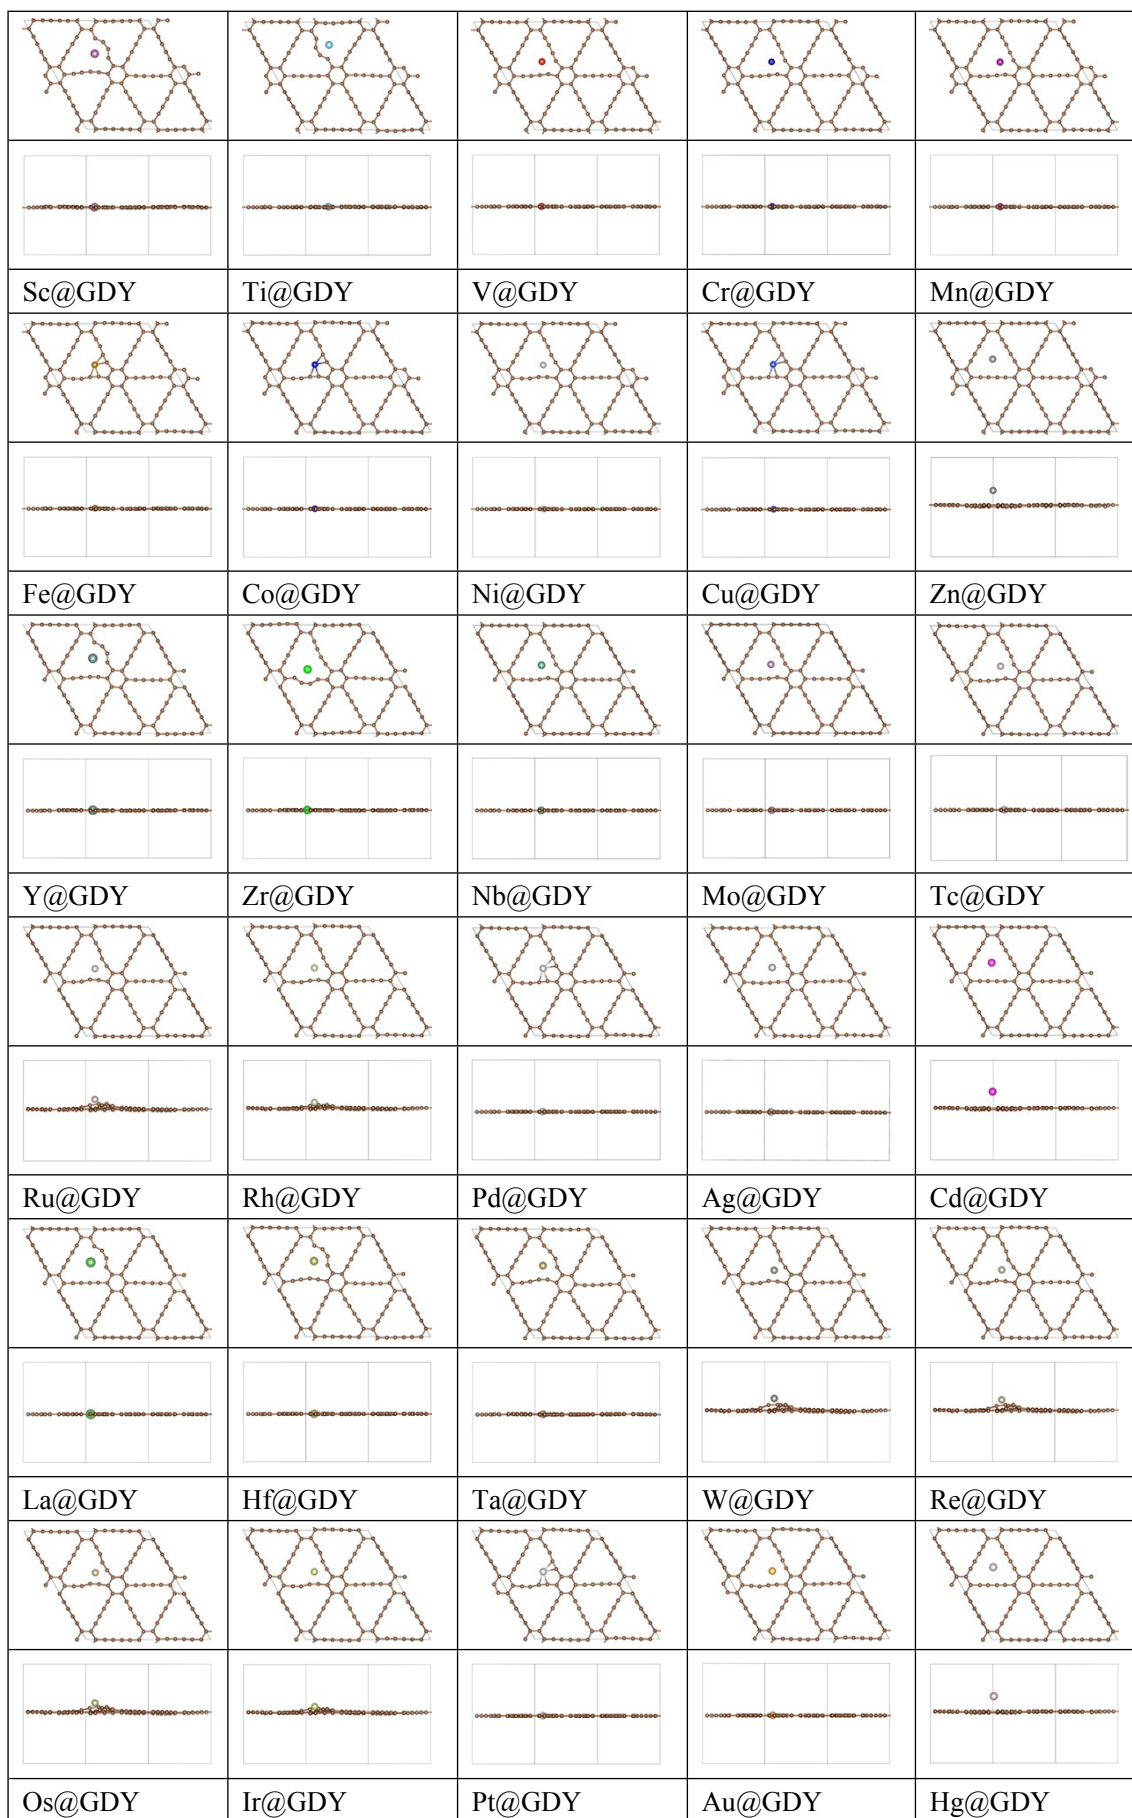

**Fig. S2.** Optimized stable geometries of TM@GDY sheets. The brown and color balls represent C and TM atoms, respectively.

The binding sites of TM and GDY can be divided into three types. The Sc, Ti, Sc, Ti, Y, Zr, La and Hf atom are anchored next to acetylene linkage; The captured Zn, Cd and Hg atom are located above the surface of GDY with a distance of 2.436 Å, 2.668 Å, 2.397 Å, respectively; The other atoms are anchored at the corner of 18 C-hexagon.

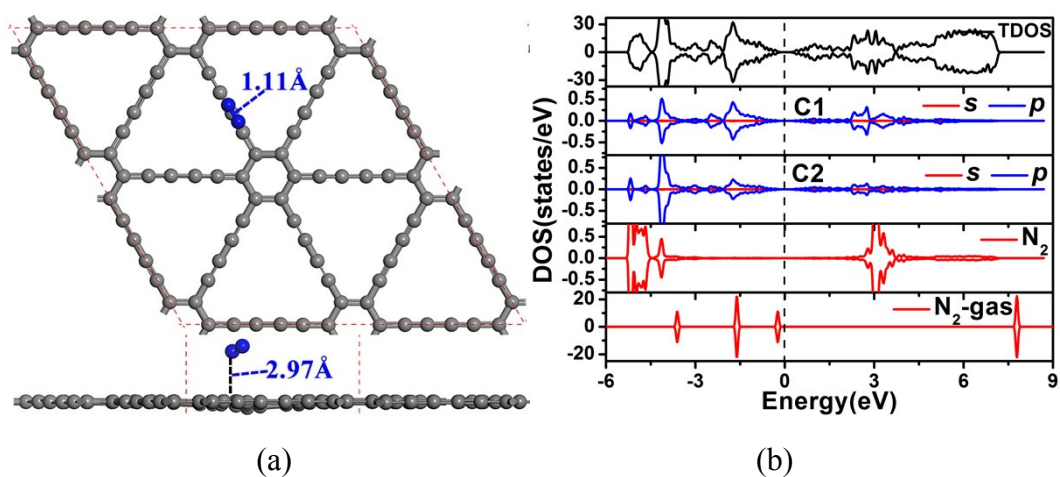

**Fig. S3.** (a) Optimized configuration of  $N_2$  molecule adsorbed on pristine GDY. (b) Density of state (DOS) of the  $N_2$ /GDY systems. The energy zero is taken as the Fermi level.

As shown in **Fig. S3**, the distance between the  $N_2$  and the GDY plane is 2.97 Å, the corresponding N-N bond length is the same as isolated  $N_2$  molecule (1.11 Å), and the adsorption energy is -0.07 eV, which indicates that the  $N_2$  is physisorbed on GDY surface.<sup>2</sup> Therefore, the pristine GDY do not capture  $N_2$  molecules efficiently.

| Systems | *N <sub>2</sub> side                                                                | *N <sub>2</sub> end                                                                 | Systems | *N <sub>2</sub> side                                                                 | *N <sub>2</sub> end                                                                   |
|---------|-------------------------------------------------------------------------------------|-------------------------------------------------------------------------------------|---------|--------------------------------------------------------------------------------------|---------------------------------------------------------------------------------------|
| Sc@GDY  | -                                                                                   | 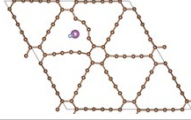   | Ti@GDY  |    |    |
|         | -                                                                                   |    |         |    |    |
| V@GDY   |    |    | Cr@GDY  |    |    |
|         |    |    |         |    |    |
| Mn@GDY  |    |    | Fe@GDY  |    |    |
|         |   |   |         |   |   |
| Co@GDY  |  |  | Ni@GDY  |  |  |
|         |  |  |         |  |  |
| Cu@GDY  | -                                                                                   |  | Y@GDY   | -                                                                                    |  |
|         | -                                                                                   |  |         | -                                                                                    |  |
| Zr@GDY  |  |  | Rh@GDY  | -                                                                                    |  |
|         |  |  |         | -                                                                                    |  |
| Pd@GDY  | -                                                                                   |  | Ag@GDY  | -                                                                                    |  |
|         | -                                                                                   |  |         | -                                                                                    |  |

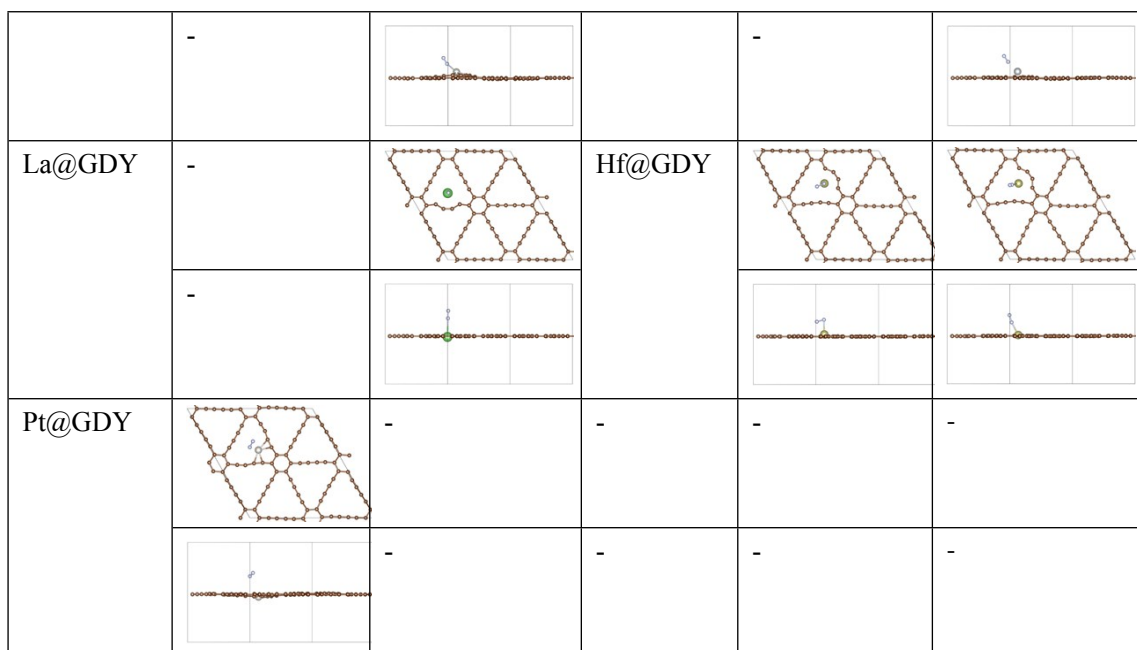

**Fig. S4.** Optimized geometries of N<sub>2</sub> adsorption on various TM@GDY sheets. The brown, blue, and color balls represent C, N, and TM atoms, respectively.

The adsorption of N<sub>2</sub> molecule on various TM@GDY surfaces was evaluated with different configurations (side-on and end-on) and adsorption sites.<sup>1</sup> For TM@GDY (TM=Sc, Cu, Y, Rh, Pd, Ag, La), the side on configurations transfer to end on configurations, while both side-on and end-on configurations can exist when TM= Ti, V, Cr, Mn, Fe, Co, Ni, Zr, Hf.

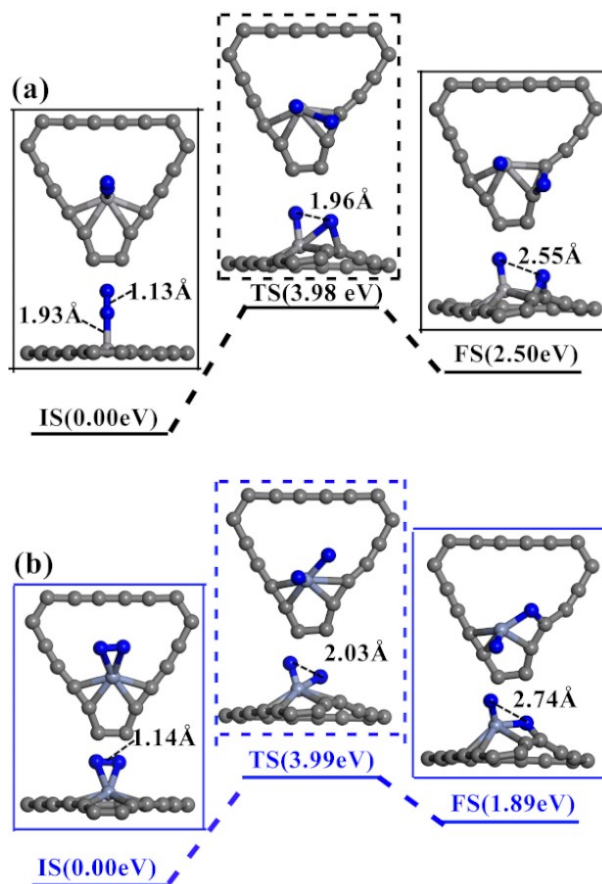

**Fig. S5.** The  $N_2$  molecule dissociation pathway on (a)  $V@GDY$  and (b)  $Cr@GDY$ . The gray and blue balls represent C and N atoms.

**Fig. S5** shows  $*N_2 \rightarrow *N + *N$  dissociation reactions on  $V@GDY$  and  $Cr@GDY$  surfaces. The reactions require to overcome a very high energy barrier of 3.98~3.99 eV and are endothermic process with large reaction energy of 2.50 eV and 1.89 eV for  $V@GDY$  and  $Cr@GDY$ , indicates that direct dissociation of  $N_2$  into two separated N atoms on  $TM@GDY$  monolayer is still hard to occur. Thereby, the  $N_2$  associative pathway is selected to further study and discuss in detail.



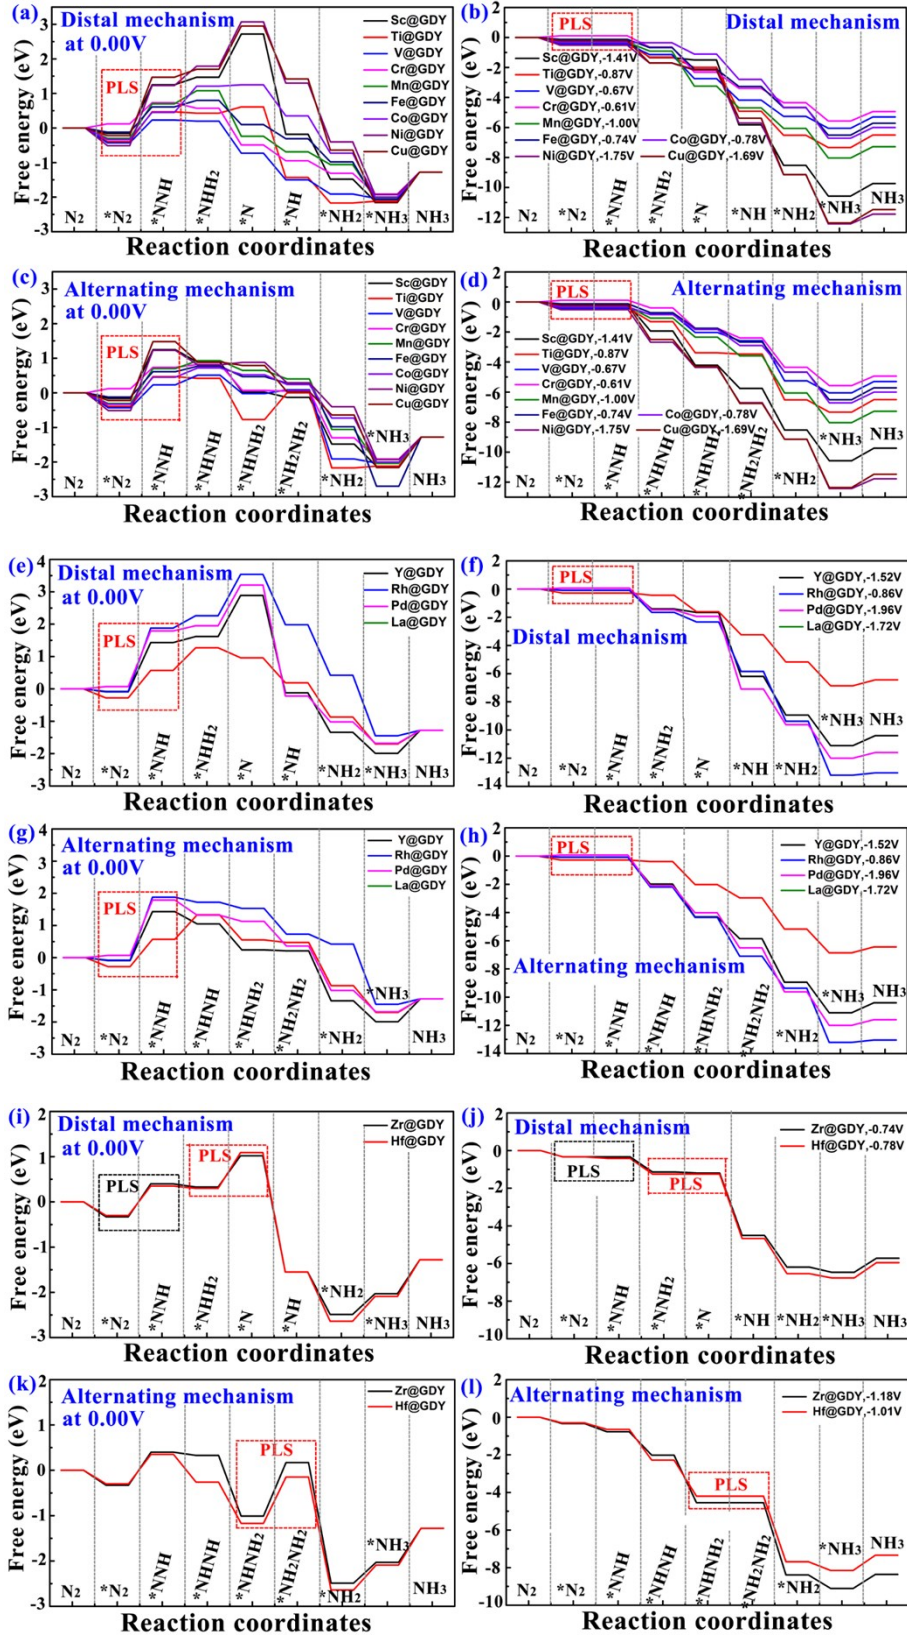

**Fig. S6.** Free-energy diagrams for  $N_2$  reduction through distal (a) at 0.00 V and (b) at  $U_L$ , and alternating mechanisms (c) at 0.00 V and (d) at  $U_L$  on TM@GDY (TM=Sc,

Ti, V, Cr, Mn, Fe, Co, Ni, Cu) surfaces. Free-energy diagrams for  $N_2$  reduction through distal (e) at 0.00 V and (f) at  $U_L$ , and alternating mechanisms (g) at 0.00 V and (h) at  $U_L$  on TM@GDY (TM=Y, Rh, Pd, La) surfaces. Free-energy diagrams for  $N_2$  reduction through distal (i) at 0.00 V and (j) at  $U_L$ , and alternating mechanisms (k) at 0.00 V and (l) at  $U_L$  on TM@GDY (TM=Zr, Hf) surfaces.

## Supplementary Tables

**Table S1** Adsorption energies ( $E_{\text{ads}}$ , in eV) of  $\text{N}_2$ , NNH, and  $\text{H}_2\text{O}$  on the V@GDY  $2\times 2$  and  $3\times 3$  super cell.

| Functional | Systems               | $E_{\text{ads, N}_2}$ (end) | $E_{\text{ads, NNH}}$ | $E_{\text{ads, H}_2\text{O}}$ |
|------------|-----------------------|-----------------------------|-----------------------|-------------------------------|
| PBE        | V@GDY ( $2\times 2$ ) | -0.88                       | -2.59                 | -0.80                         |
| PBE        | V@GDY ( $3\times 3$ ) | -0.90                       | -2.60                 | -0.81                         |
| PBE+U      | V@GDY ( $2\times 2$ ) | -0.85                       | -2.55                 | -0.72                         |

In order to evaluate the effect of supercell, the adsorption energies of  $\text{N}_2$ , NNH, and  $\text{H}_2\text{O}$  on V@GDY in a  $2\times 2$  and  $3\times 3$  supercell were calculated and are shown in Table S3. The little difference of the computed adsorption energies suggest that the computed results are acceptable in this work.

In order to further evaluate the reliability of our results, PBE+U was conducted to re-examine the adsorption energies of  $\text{N}_2$ , NNH, and  $\text{H}_2\text{O}$  on V@GDY in a  $2\times 2$  supercell. The slight difference again shows that our results are acceptable in this work.

**Table S2** Zero-point energy corrections ( $E_{ZPE}$ ) and entropic contributions (at 298.15 K) to the free energies of the adsorbed species on TM@GDY estimated from the vibrational frequencies.

| Species                           | $\Delta E_{ZPE}$ | $T\Delta S$ |
|-----------------------------------|------------------|-------------|
| *N <sub>2</sub>                   | 0.1948           | 0.1340      |
| *N-NH                             | 0.4651           | 0.1433      |
| *N-NH <sub>2</sub>                | 0.8534           | 0.1273      |
| *NH-NH                            | 0.8108           | 0.1423      |
| *NH-NH <sub>2</sub>               | 1.1197           | 0.1742      |
| *NH <sub>2</sub> -NH <sub>2</sub> | 1.4782           | 0.2566      |
| *N                                | 0.0929           | 0.0498      |
| *NH                               | 0.3480           | 0.0909      |
| *NH <sub>2</sub>                  | 0.6447           | 0.0144      |
| *NH <sub>3</sub>                  | 1.0135           | 0.1413      |
| N <sub>2</sub>                    | 0.15             | 0.58        |
| H <sub>2</sub>                    | 0.27             | 0.41        |
| NH <sub>3</sub>                   | 0.58             | 0.56        |

**Table S3** Binding energy ( $E_b$ ) of TM atom and GDY, cohesive energy of bulk metal ( $E_{coh}$ ), energy difference ( $\Delta E_b$ ) between binding energy ( $E_b$ ) and cohesive energy ( $E_{coh}$ ), total magnetic moments ( $M_{tot}$ ) and the amounts of charge ( $\Delta Q$ ) transmitted from the TM atoms to the GDY monolayers ('-' means losing electrons) of TM@GDY structure.

|                   |        |        |        |        |        |
|-------------------|--------|--------|--------|--------|--------|
| Systems           | Sc@GDY | Ti@GDY | V@GDY  | Cr@GDY | Mn@GDY |
| $E_b$ (eV)        | 6.49   | 6.39   | 5.33   | 3.92   | 4.11   |
| $E_{coh}$ (eV)    | 4.19   | 5.46   | 5.37   | 4.01   | 3.86   |
| $\Delta E_b$ (eV) | 2.30   | 0.93   | -0.04  | -0.08  | 0.25   |
| $\Delta Q$ (e)    | +1.43  | +1.28  | +1.04  | +0.89  | +0.83  |
| $M_{tot}(\mu_B)$  | 0      | 1.15   | 2.55   | 3.64   | 3.54   |
| Systems           | Fe@GDY | Co@GDY | Ni@GDY | Cu@GDY | Zn@GDY |
| $E_b$ (eV)        | 5.02   | 5.56   | 6.75   | 3.80   | 0.92   |
| $E_{coh}$ (eV)    | 4.78   | 5.36   | 4.90   | 3.51   | 1.12   |
| $\Delta E_b$ (eV) | 0.24   | 0.20   | 1.85   | 0.29   | -0.20  |
| $\Delta Q$ (e)    | +0.50  | +0.61  | +0.49  | +0.47  | -      |
| $M_{tot}(\mu_B)$  | 2.00   | 1.00   | 0      | 0      | 0      |
| Systems           | Y@GDY  | Zr@GDY | Nb@GDY | Mo@GDY | Tc@GDY |
| $E_b$ (eV)        | 6.85   | 7.39   | 6.34   | 4.78   | 5.58   |
| $E_{coh}$ (eV)    | 4.26   | 6.29   | 6.87   | 6.21   | 6.67   |
| $\Delta E_b$ (eV) | 2.59   | 1.09   | -0.53  | -1.43  | -1.09  |
| $\Delta Q$ (e)    | -      | -      | -      | -      | -      |
| $M_{tot}(\mu_B)$  | 0      | 1.07   | 2.51   | 2.44   | 3.08   |
| Systems           | Ru@GDY | Rh@GDY | Pd@GDY | Ag@GDY | Cd@GDY |
| $E_b$ (eV)        | 5.98   | 5.82   | 4.42   | 2.55   | 1.95   |
| $E_{coh}$ (eV)    | 6.15   | 5.89   | 3.74   | 2.35   | 5.19   |
| $\Delta E_b$ (eV) | -0.17  | -0.07  | 0.68   | 0.20   | -3.24  |
| $\Delta Q$ (e)    | -      | -      | +0.71  | -      | -      |
| $M_{tot}(\mu_B)$  | 0      | 1.00   | 0      | 0      | 0      |
| Systems           | La@GDY | Hf@GDY | Ta@GDY | W@GDY  | Re@GDY |
| $E_b$ (eV)        | 7.57   | 7.14   | 6.92   | 6.31   | 5.95   |
| $E_{coh}$ (eV)    | 4.32   | 6.44   | 8.28   | 8.42   | 7.58   |
| $\Delta E_b$ (eV) | 3.25   | 0.70   | -1.36  | -2.11  | -1.63  |
| $\Delta Q$ (e)    | -      | -      | -      | -      | -      |
| $M_{tot}(\mu_B)$  | 0      | 1.07   | 2.08   | 1.79   | 1.00   |
| Systems           | Os@GDY | Ir@GDY | Pt@GDY | Au@GDY | Hg@GDY |
| $E_b$ (eV)        | 6.63   | 6.31   | 5.82   | 2.46   | 1.29   |

|                                  |       |       |       |       |       |
|----------------------------------|-------|-------|-------|-------|-------|
| $E_{\text{coh}}(\text{eV})$      | 7.74  | 7.21  | 5.71  | 2.86  | 1.67  |
| $\Delta E_{\text{b}}(\text{eV})$ | -1.11 | -0.90 | 0.12  | -0.40 | -0.38 |
| $\Delta Q$ (e)                   | -     | -     | +0.11 | -     | -     |
| $M_{\text{tot}}(\mu_{\text{B}})$ | 0     | 1.00  | 0     | 0     | 0     |

---

**Table S4** The calculated limiting potentials ( $U_L$  in V) and PLS for the different catalysts that have been synthesized very recently.

| Systems                                        | Pathway                    | PLS                                                                   | $U_L$ (V)    | References                         |
|------------------------------------------------|----------------------------|-----------------------------------------------------------------------|--------------|------------------------------------|
| <b>V@GDY</b>                                   | <b>Distal/ Alternating</b> | <b>*N<sub>2</sub>+H<sup>+</sup>+e<sup>-</sup>→*NNH</b>                | <b>-0.67</b> | <b>Present work</b>                |
| Ti@GDY                                         | Distal/ Alternating        | *N <sub>2</sub> +H <sup>+</sup> +e <sup>-</sup> →*NNH                 | -0.87        | Present work                       |
| Fe@GDY                                         | Distal/ Alternating        | *N <sub>2</sub> +H <sup>+</sup> +e <sup>-</sup> →*NNH                 | -0.74        | Present work                       |
| Co@GDY                                         | Distal/ Alternating        | *N <sub>2</sub> +H <sup>+</sup> +e <sup>-</sup> →*NNH                 | -0.78        | Present work                       |
| Zr@GDY                                         | Distal                     | *N <sub>2</sub> +H <sup>+</sup> +e <sup>-</sup> →*NNH                 | -0.74        | Present work                       |
| Rh@GDY                                         | Distal/ Alternating        | *N <sub>2</sub> +H <sup>+</sup> +e <sup>-</sup> →*NNH                 | -0.86        | Present work                       |
| Hf@GDY                                         | Distal                     | *NNH <sub>2</sub> +H <sup>+</sup> +e <sup>-</sup> →*N+NH <sub>3</sub> | -0.78        | Present work                       |
| Co <sub>2</sub> @GDY                           | Distal                     | *NH <sub>2</sub> +H <sup>+</sup> +e <sup>-</sup> →*NH <sub>3</sub>    | -0.43        | Ma et al. 2019 <sup>3</sup>        |
| Nb <sub>2</sub> O <sub>5</sub> (181)           | Distal                     | *NNH <sub>2</sub> +H <sup>+</sup> +e <sup>-</sup> →*N+NH <sub>3</sub> | -0.56        | Han et al. 2018 <sup>4</sup>       |
| Defect-rich MoS <sub>2</sub>                   | Distal                     | *NH <sub>2</sub> +H <sup>+</sup> +e <sup>-</sup> →*NH <sub>3</sub>    | -0.60        | Li et al. 2018 <sup>5</sup>        |
| Ru <sub>1</sub> -N <sub>3</sub>                | Distal                     | *N <sub>2</sub> +H <sup>+</sup> +e <sup>-</sup> →*NNH                 | -0.73        | Li et al. 2018 <sup>6</sup>        |
| Ru <sub>1</sub> -N <sub>4</sub>                | Distal                     | *N <sub>2</sub> +H <sup>+</sup> +e <sup>-</sup> →*NNH                 | -0.77        | Li et al. 2018 <sup>6</sup>        |
| MoS <sub>2</sub> with Mo edge                  | Distal                     | *N <sub>2</sub> +H <sup>+</sup> +e <sup>-</sup> →*NNH                 | -0.68        | Zhang et al. 2018 <sup>7</sup>     |
| Mo <sub>2</sub> C (111)                        | Distal                     | *N <sub>2</sub> +H <sup>+</sup> +e <sup>-</sup> →*NNH                 | -0.74        | Ren et al. 2019 <sup>8</sup>       |
| Mo <sub>2</sub> C (002)                        | Distal                     | *NH <sub>2</sub> +H <sup>+</sup> +e <sup>-</sup> →*NH <sub>3</sub>    | -0.92        | Chen et al. 2018 <sup>9</sup>      |
| Ru(0001)                                       | Distal                     | *N <sub>2</sub> +H <sup>+</sup> +e <sup>-</sup> →*NNH                 | -0.94        | Skulason et al. 2012 <sup>10</sup> |
| Ru <sub>1</sub> @C <sub>2</sub> N              | Distal/ Alternating        | *N <sub>2</sub> +H <sup>+</sup> +e <sup>-</sup> →*NNH                 | -0.96        | Cao et al. 2018 <sup>11</sup>      |
| W@N-doped graphyne                             | Distal                     | *N <sub>2</sub> +H <sup>+</sup> +e <sup>-</sup> →*NNH                 | -0.29        | He et al. 2019 <sup>12</sup>       |
| V/ β <sub>12</sub> boron monolayer             | -                          | *N <sub>2</sub> +H <sup>+</sup> +e <sup>-</sup> →*NNH                 | -0.28        | Zhu et al. 2019 <sup>13</sup>      |
| Mo <sub>1</sub> -N <sub>1</sub> C <sub>2</sub> | Enzymatic                  | *N <sub>2</sub> +H <sup>+</sup> +e <sup>-</sup> →*NNH                 | -0.40        | Lin et al. 2018 <sup>14</sup>      |
| Mo-embedded BN monolayer                       | Enzymatic                  | *NH <sub>2</sub> +H <sup>+</sup> +e <sup>-</sup> →*NH <sub>3</sub>    | -0.35        | Zhao et al. 2017 <sup>15</sup>     |
| Mo <sup>0</sup> /GDY                           | Alternating                | *NHNH+H <sup>+</sup> +e <sup>-</sup> →*NHNH <sub>2</sub>              | -0.71        | Hui et al. 2019 <sup>16</sup>      |





## References

- 1 Zhen Feng, Renyi Li, Yaqiang Ma, Yi Li, Dong Wei, Yanan Tang, Xianqi Dai. Molecule-level graphdiyne coordinated transition metals as a new class of bifunctional electrocatalysts for oxygen reduction and oxygen evolution reactions. *Physical Chemistry Chemical Physics*, 2019, 21, 19651-19659.
- 2 Zhen Feng, Yanan Tang, Weiguang Chen, Dong Wei, Yaqiang Ma, Xianqi Dai. O-doped graphdiyne as metal-free catalysts for nitrogen reduction reaction. *Molecular Catalysis* 2020, 483, 110705.
- 3 Dongwei Ma, Zeng Zaiping, Liu Liangliang, et al. Computational evaluation of electrocatalytic nitrogen reduction on TM single-, double-, and triple-atom catalysts (TM = Mn, Fe, Co, Ni) based on graphdiyne monolayers. *The Journal of Physical Chemistry C*, 2019, 123(31), 19066-19076.
- 4 Jingrui Han, Liu Zaichun, Ma Yongjun, et al. Ambient N<sub>2</sub> fixation to NH<sub>3</sub> at ambient conditions: Using Nb<sub>2</sub>O<sub>5</sub> nanofiber as a high-performance electrocatalyst. *Nano Energy*, 2018, 52, 52264-270.
- 5 Xianghong Li, Li Tingshuai, Ma Yongjun, et al. Boosted electrocatalytic N<sub>2</sub> reduction to NH<sub>3</sub> by defect-rich MoS<sub>2</sub> nanoflower. *Advanced Energy Materials*, 2018, 8(30), 1801357.
- 6 Zhigang Geng, Liu Yan, Kong Xiangdong, et al. Achieving a record-high yield rate of 120.9 μg NH<sub>3</sub> mg cat.<sup>-1</sup> h<sup>-1</sup> for N<sub>2</sub> electrochemical reduction over Ru single-atom catalysts. *Advanced Materials*, 2018, 30(40), 1803498.
- 7 Ling Zhang, Ji Xuqiang, Ren Xiang, et al. Electrochemical ammonia synthesis via nitrogen reduction reaction on a MoS<sub>2</sub> catalyst: Theoretical and experimental studies. *Advanced Materials*, 2018, 30(28), 1800191.
- 8 Xiang Ren, Zhao Jinxiu, Wei Qin, et al. High-performance N<sub>2</sub>-to-NH<sub>3</sub> conversion electrocatalyzed by Mo<sub>2</sub>C nanorod. *ACS Central Science*, 2019, 5(1), 116-121.
- 9 Hui Cheng, Ding Liang-Xin, Chen Gao-Feng, et al. Molybdenum carbide nanodots enable efficient electrocatalytic nitrogen fixation under ambient conditions. *Advanced Materials*, 2018, 30(46), 1803694.
- 10 Egill Skúlason, Bligaard Thomas, Gudmundsdóttir Sigrídur, et al. A theoretical evaluation of possible transition metal electro-catalysts for N<sub>2</sub> reduction. *Physical Chemistry Chemical Physics*, 2012, 14(3), 1235-1245.
- 11 Yongyong Cao, Gao Yijing, Zhou Hu, et al. Highly efficient ammonia synthesis electrocatalyst: Single Ru atom on naturally nanoporous carbon materials. *Advanced Theory and Simulations*, 2018, 18000181-10.
- 12 Tianwei He, Sri Kasi-M, Du Aijun. Single tungsten atom supported on N-doped graphyne as a high-performance electrocatalyst for nitrogen fixation under ambient conditions. *Physical Chemistry Chemical Physics*, 2019, 21, 1546-15551.
- 13 Hao-Ran Zhu, Hu Yan-Ling, Wei Shi-Hao, et al. Single-metal atom anchored on boron monolayer (β<sub>12</sub>) as an electrocatalyst for nitrogen reduction into ammonia at ambient conditions: A first-principles study. *The Journal of Physical Chemistry C*, 2019, 123(7), 4274-4281.

- 14 Chongyi Ling, Bai Xiaowan, Ouyang Yixin, et al. Single molybdenum atom anchored on N-doped carbon as a promising electrocatalyst for nitrogen reduction into ammonia at ambient conditions. *The Journal of Physical Chemistry C*, 2018, 122(29), 16842-16847.
- 15 Jingxiang Zhao, Chen Zhongfang. Single Mo atom supported on defective boron nitride monolayer as an efficient electrocatalyst for nitrogen fixation: A computational study. *Journal of the American Chemical Society*, 2017, 139(36), 12480-12487.
- 16 Lan Hui, Xue Yurui, Yu Huidi, et al. Highly efficient and selective generation of ammonia and hydrogen on a graphdiyne-based catalyst. *Journal of the American Chemical Society*, 2019, 141(27), 10677-10683.
